# Supplementary material for: The Mediterranean climate change hotspot in the CMIP5 and CMIP6 projections
Source: Copernicus journal article supplement (doi:10.5194/esd-2021-65), 2021-07-30
Supplement: Supplementary file [file esd-2021-65-AC3-supplement.pdf]

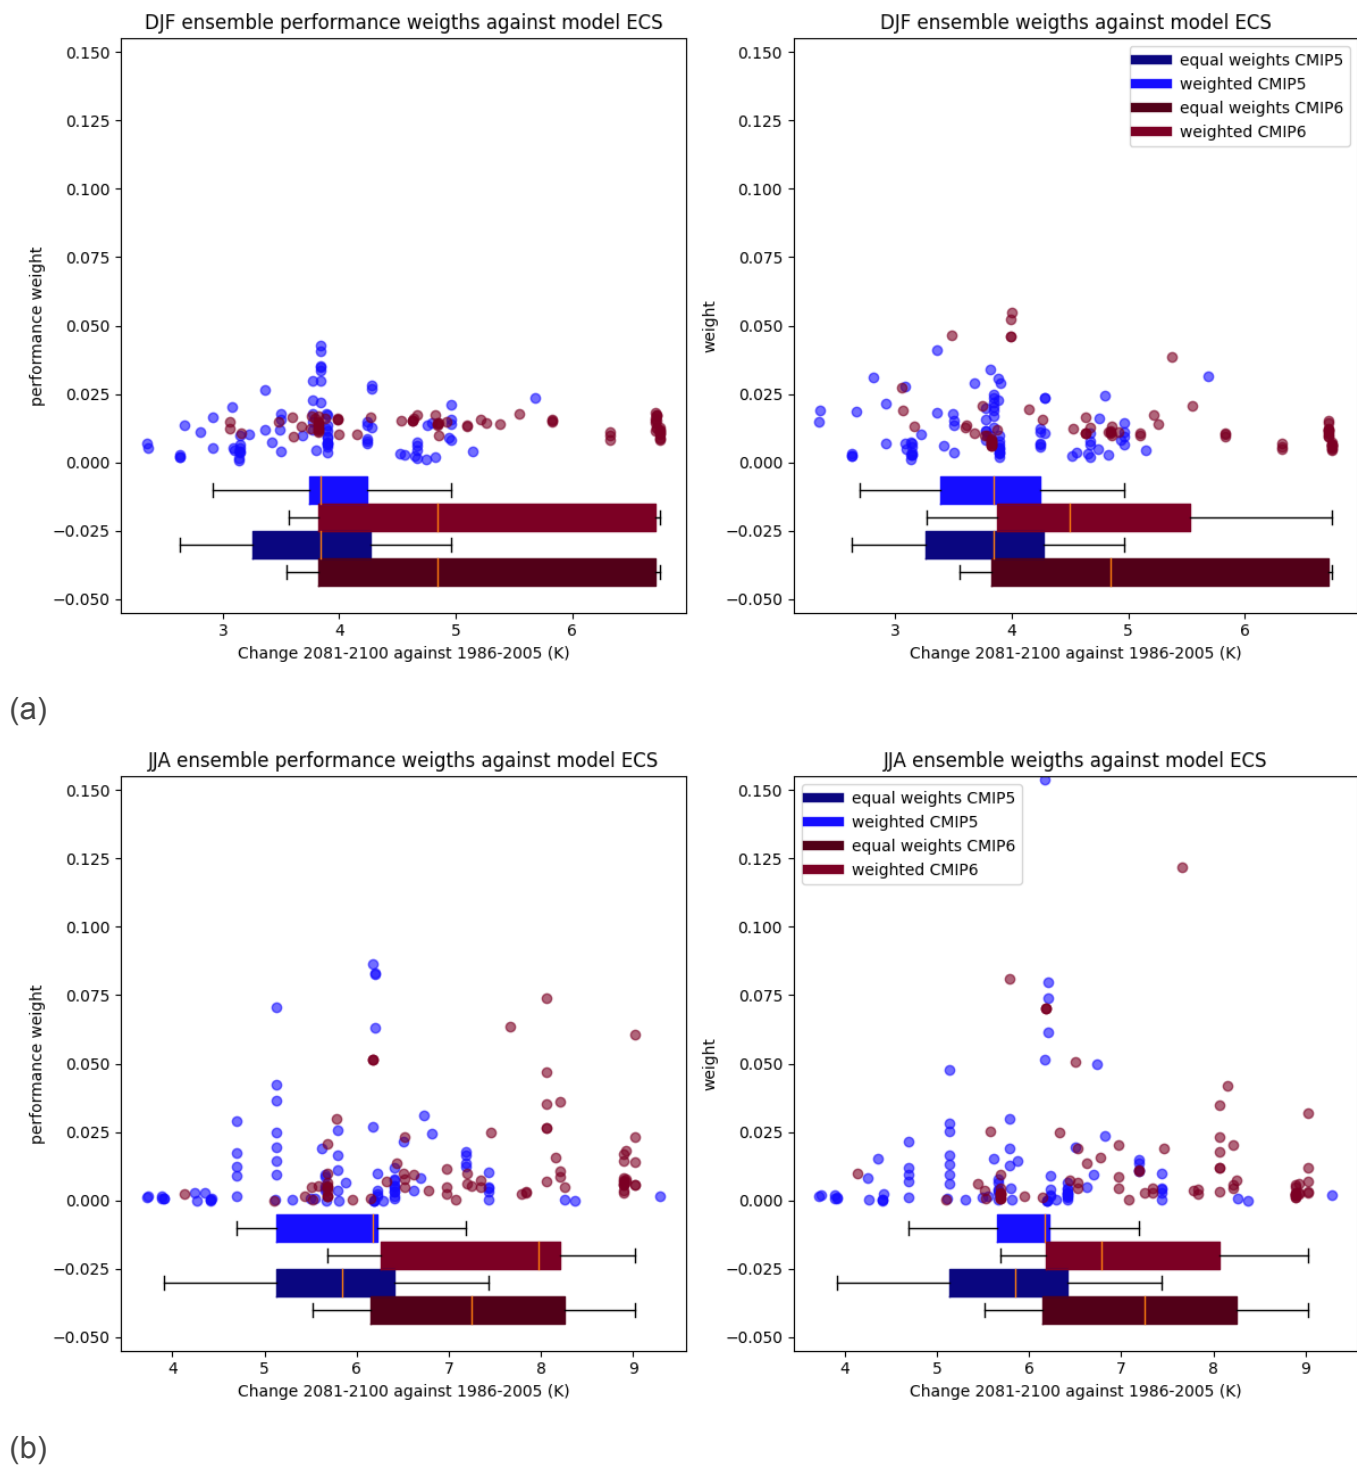

**Figure 1:** Scatter plot displaying the performance weights (left) and the full weights (right) against their 2081-2100 warmings with respect to 1986-2005 for DJF (a) and JJA (b). The boxplots represent the long-term warming distributions for weighted (darker colour) and unweighted (lighter colour) from the CMIP5 (blue) and CMIP6 (red) ensembles.

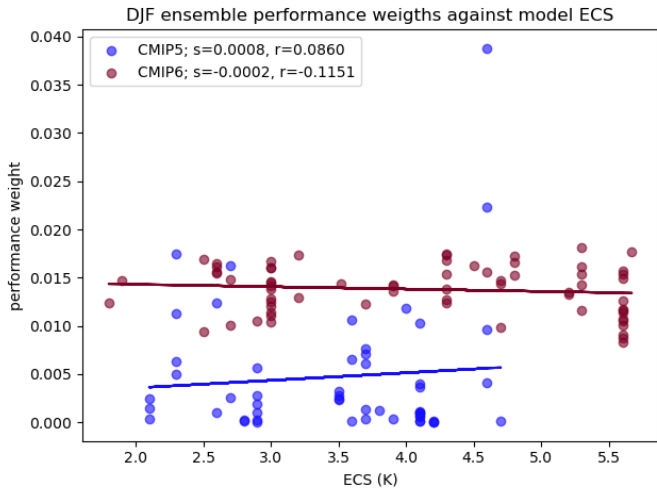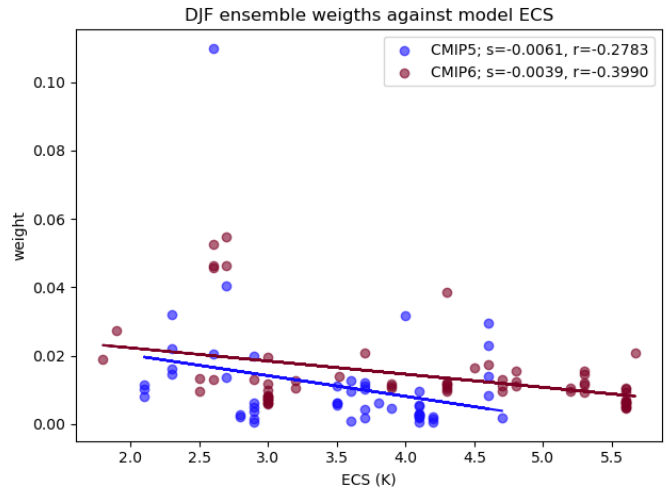

(a)

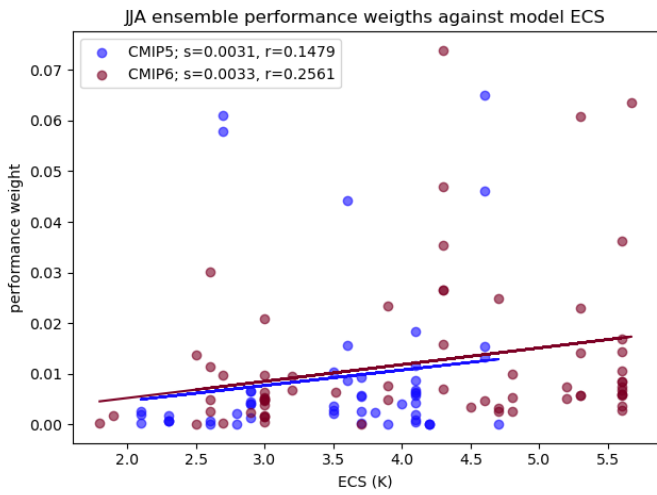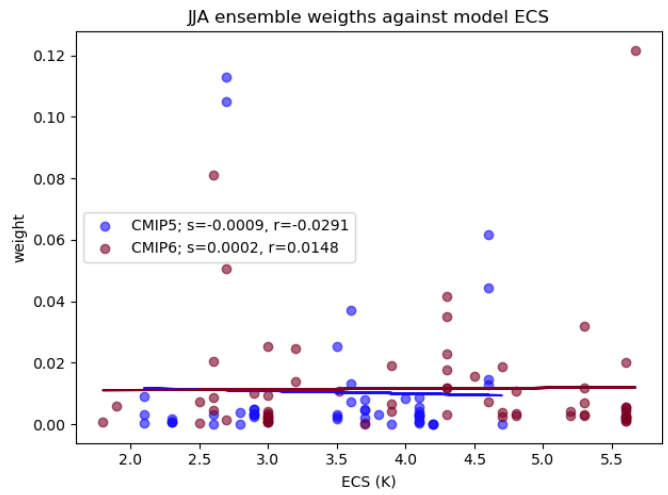

(b)

**Figure 2:** Scatter of the single-member relation between performance weight (left) and the full weight (right) against the model's ECS for DJF (a) and JJA (b). The least-squares linear regression fits are represented by the blue (CMIP5) and red (CMIP6) lines.
